# Supplementary material
Source: MDPI journal article supplement (https://www.mdpi.com/2227-9717/9/6/950)
Supplement: s1 [file s1]

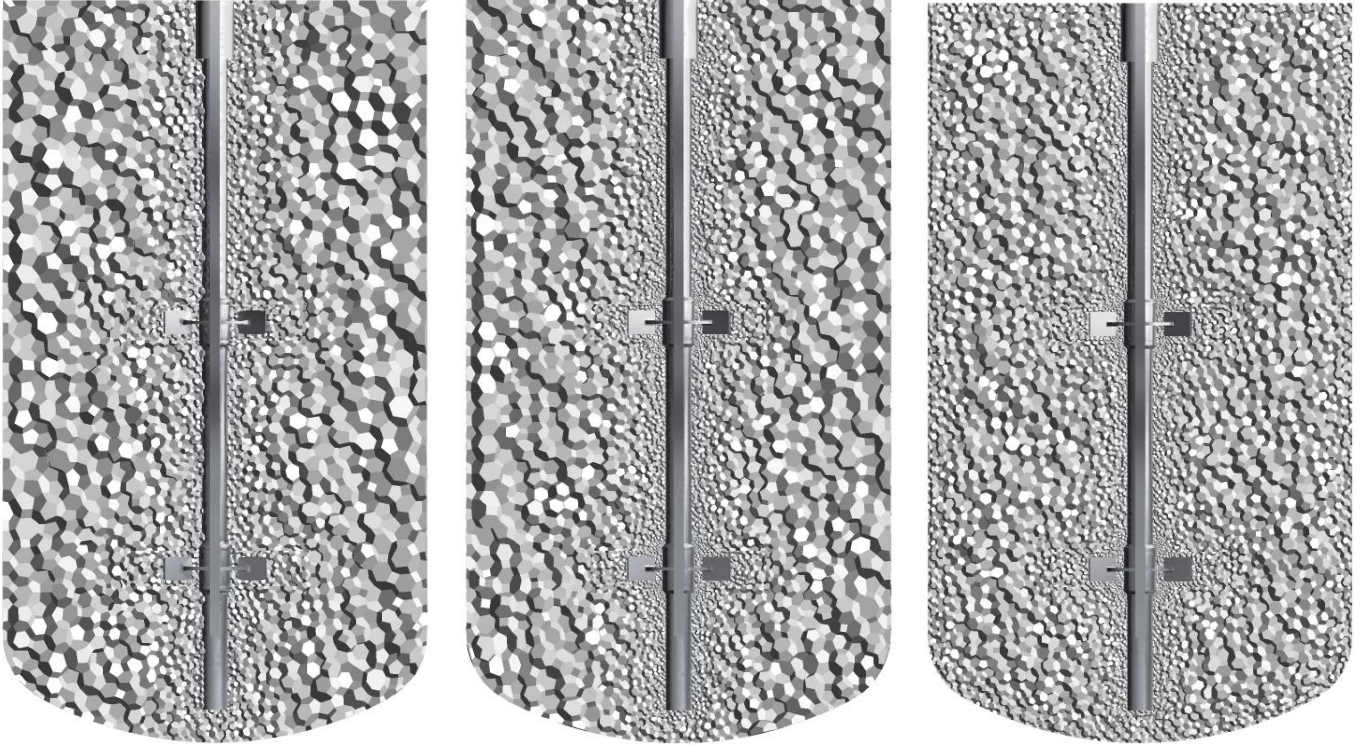

**Figure S1:** Polyhedral mesh generated by Ansys Fluent meshing. From left to right increasing mesh density of 100 000, 400 000 to 700 000 polyhedral cells.

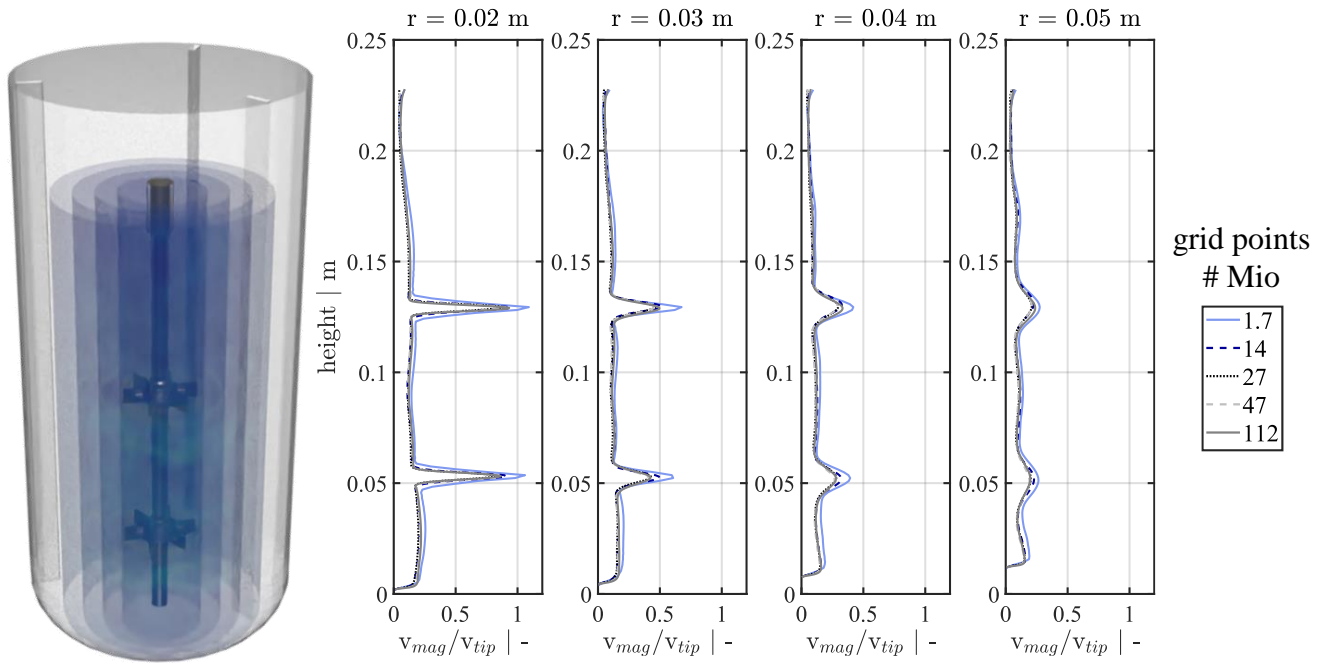

**Figure S2:** Time and azimuthal averaged profiles of normalized velocity magnitude for the baffled system at  $n = 250$  rpm. Axial profiles are shown averaged at a specific radial position.

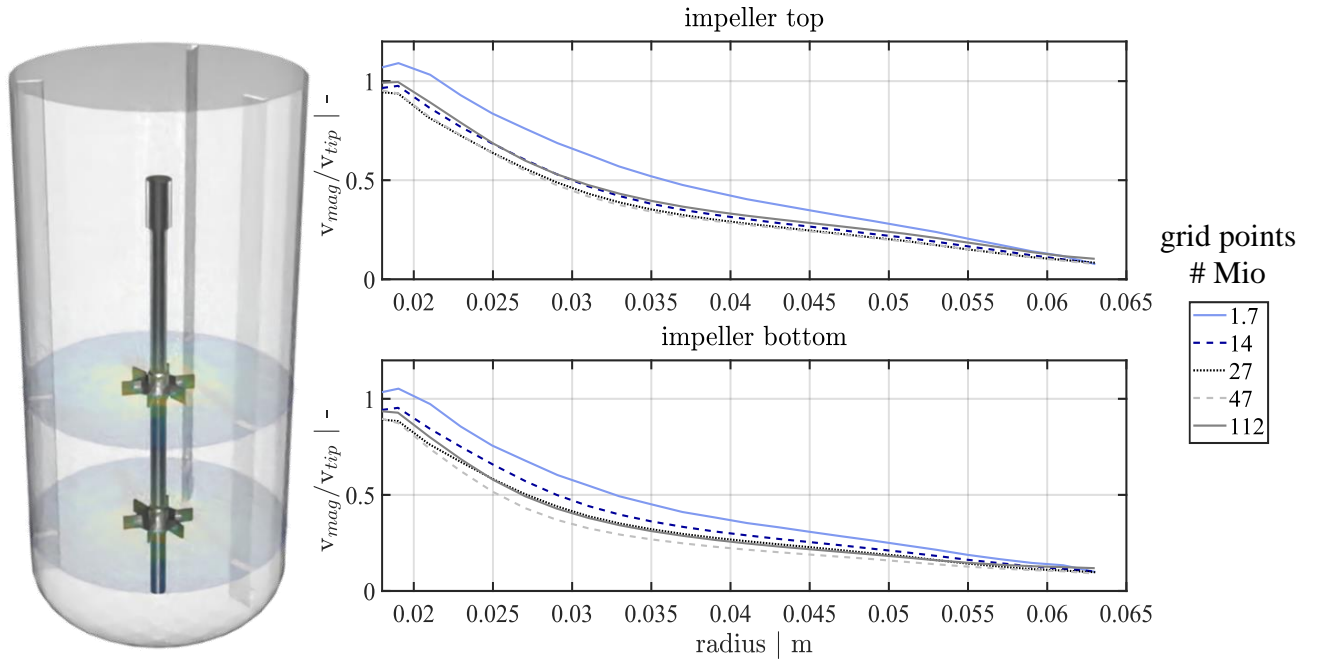

**Figure S3:** Time and azimuthal averaged profiles of normalized velocity magnitude for the baffled system at  $n = 350$  rpm. Profiles were averaged at different radial positions within the impeller discharge stream of top and bottom impeller.

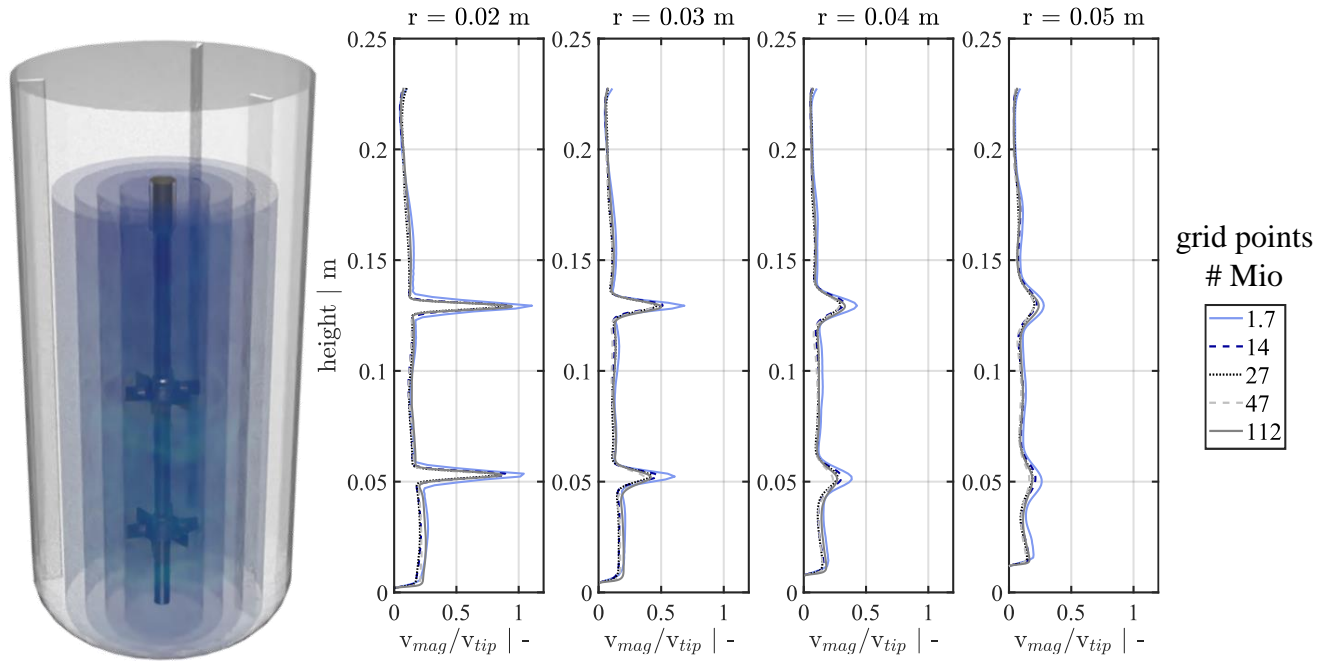

**Figure S4:** Time and azimuthal averaged profiles of normalized velocity magnitude for the baffled system at  $n = 350$  rpm. Axial profiles are shown averaged at a specific radial position.

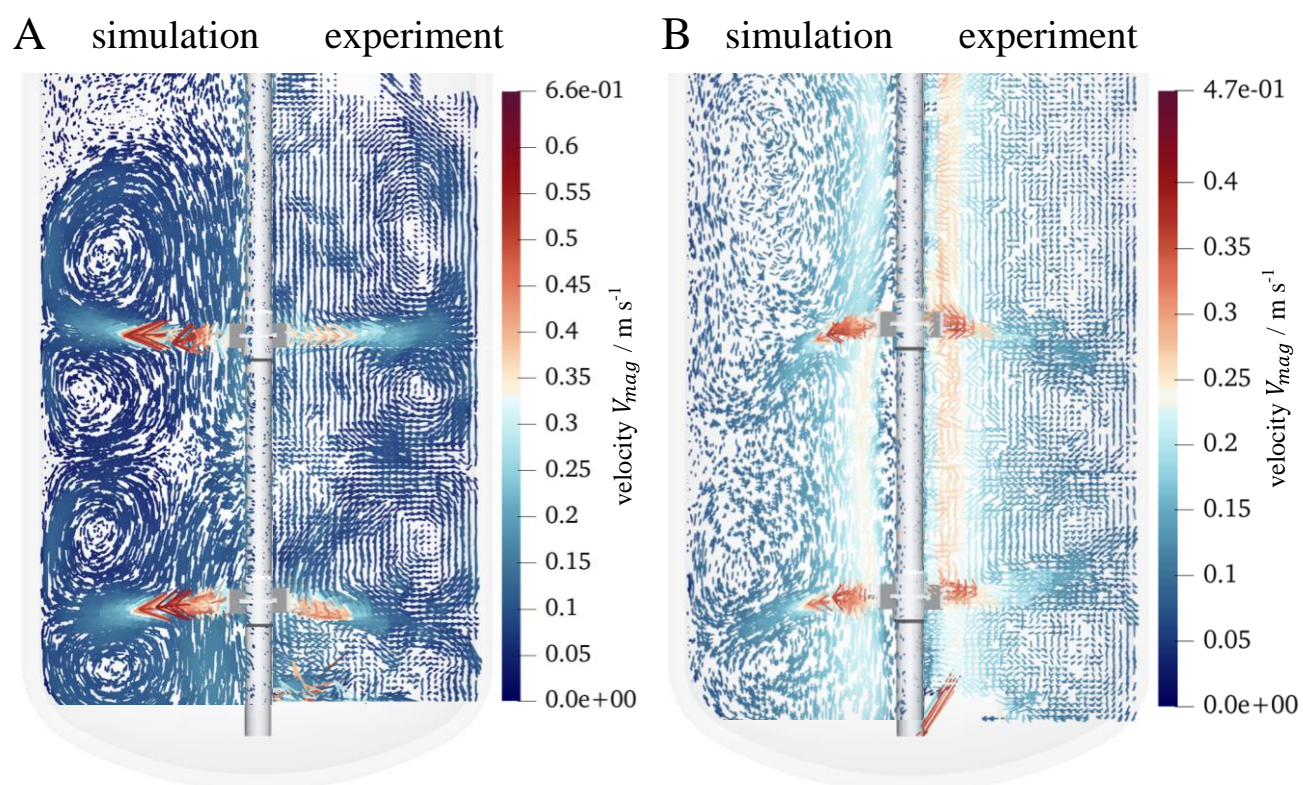

**Figure S5:** Time averaged velocity magnitude vector field of the baffled system at  $n = 350$  rpm (A) and the unbaffled system at  $n = 250$  rpm (B).
